# Supplementary material
Source: PubMed Central journal article supplement (PMC2785671)
Supplement: supp_M109.031278_jbc.M109.031278-1.pdf [file supp_M109.031278_jbc.M109.031278-1.pdf]

Supplementary Figure S1

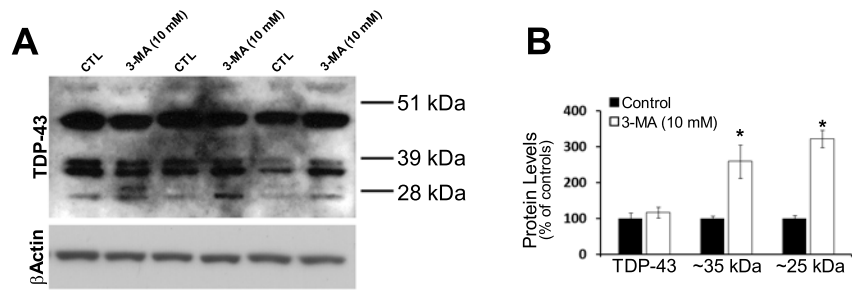

**Figure S1. 3-MA increases the steady-state levels of the C-terminal fragments of TDP-43.** (A) Representative western blot probed with a polyclonal anti-TDP-43 antibody of proteins extracted from cells transfected with C199-TDP and treated with 10mM 3-MA or vehicle. (B) Quantitative analysis of three independent experiments (n=3/experiment). Note the significant increase in the steady-state levels of low-molecular weight TDP-43 fragments after the administration of 10 mM 3-MA. Data were analyzed using one-way ANOVA following by post hoc Bonferroni test to determine individual differences in groups. \* indicates a  $p < 0.001$ .
